# Supplementary material for: Exploring the Potential Biocontrol Isolates of Trichoderma asperellum for Management of Collar Rot Disease in Tomato
Source: MDPI journal article supplement (doi:10.3390/horticulturae9101116), 2023-10-10
Supplement: s1 [file s1]

# Exploring the Potential Biocontrol Isolates of *Trichoderma asperellum* for Management of Collar Rot Disease in Tomato

C. Shanmugaraj <sup>1</sup>, Deeba Kamil <sup>1,\*</sup>, Aditi Kundu <sup>2</sup>, Praveen Kumar Singh <sup>3</sup>, Amrita Das <sup>1</sup>, Zakir Hussain <sup>4</sup>, Robin Gogoi <sup>1</sup>, P. R. Shashank <sup>5</sup>, R. Gangaraj <sup>1</sup> and M. Chaithra <sup>1</sup>

<sup>1</sup> Division of Plant Pathology, ICAR-Indian Agricultural Research Institute, New Delhi 110012, India

<sup>2</sup> Division of Agricultural Chemicals, ICAR-Indian Agricultural Research Institute, New Delhi 110012, India

<sup>3</sup> Division of Centre for Protected Cultivation Technology (CPCT),  
ICAR-Indian Agricultural Research Institute, New Delhi 110012, India

<sup>4</sup> Division of Vegetable Science, ICAR-Indian Agricultural Research Institute, New Delhi 110012, India

<sup>5</sup> Division of Entomology, ICAR-Indian Agricultural Research Institute, New Delhi 110012, India

\* Correspondence: deebakamil@gmail.com (D.K.)

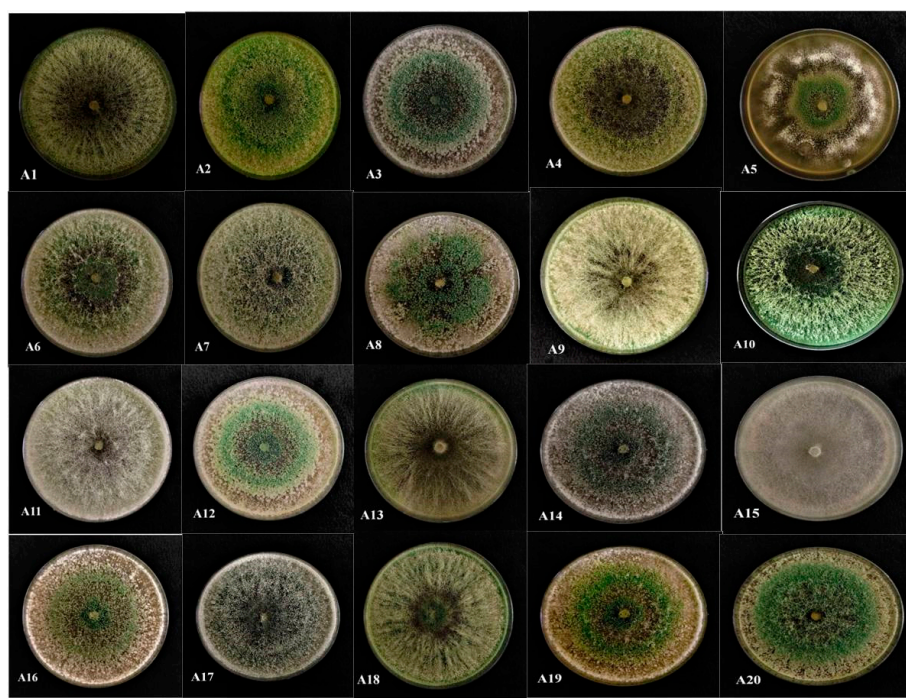

**Figure S1:** Growth characteristics of different isolates of *Trichoderma asperellum* on potato dextrose agar (PDA) after 7 days of incubation at 28±2 °C.

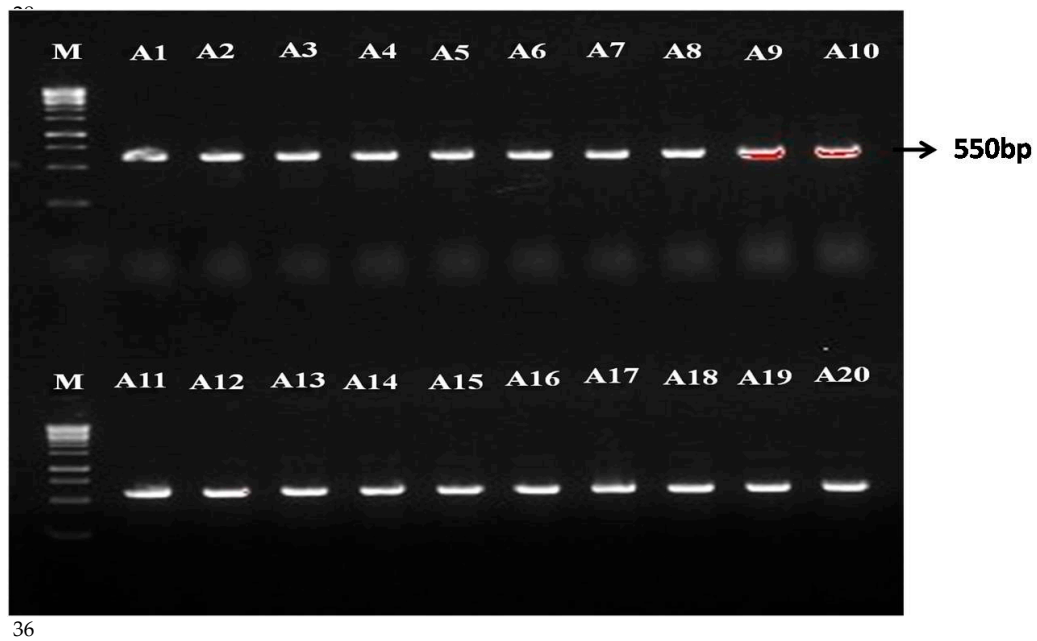

**Figure S2:** PCR amplification patterns in ITS1-5.8S-ITS2 with ITS1/ITS4 primers from twenty *Trichoderma asperellum* isolates; L is 1000-bp DNA ladder

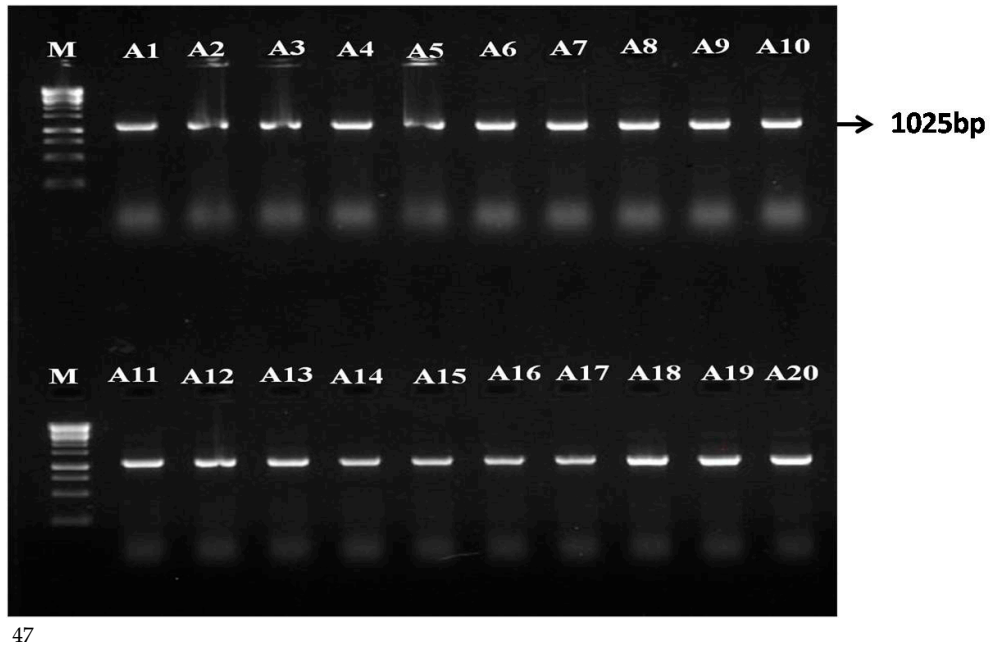

**Figure S3:** PCR amplification patterns in  $\beta$ -tubulin with B-tubf1-F / B-tubr1-R primers from twenty *Trichoderma asperellum* isolates; L is 1000-bp DNA ladder

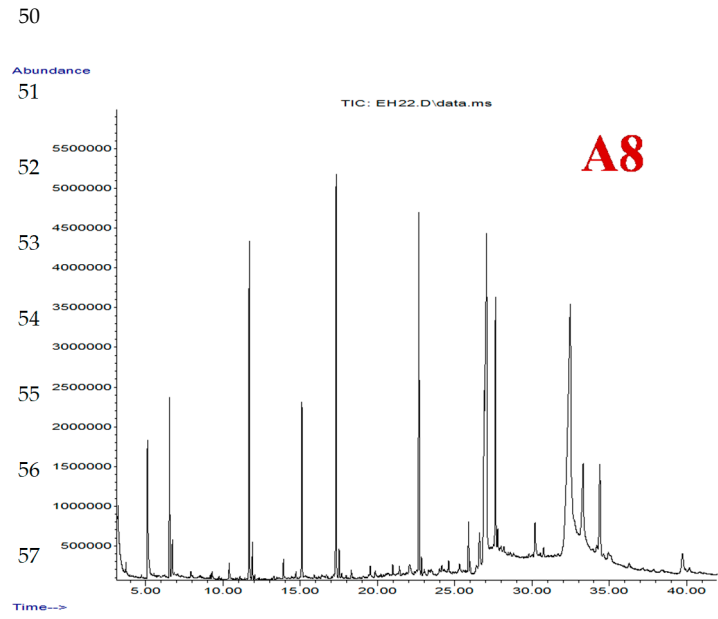

58

**Figure S4:** GC-MS chromatogram of secondary metabolites from A8 isolate of *T. asperellum*

59

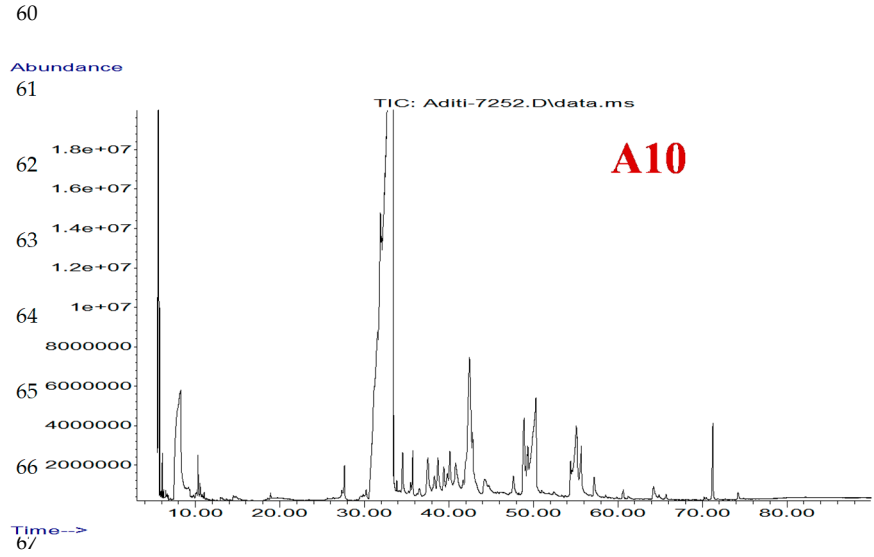

68

**Figure S5:** GC-MS chromatogram of secondary metabolites from A10 isolate of *T. asperellum*

69

70

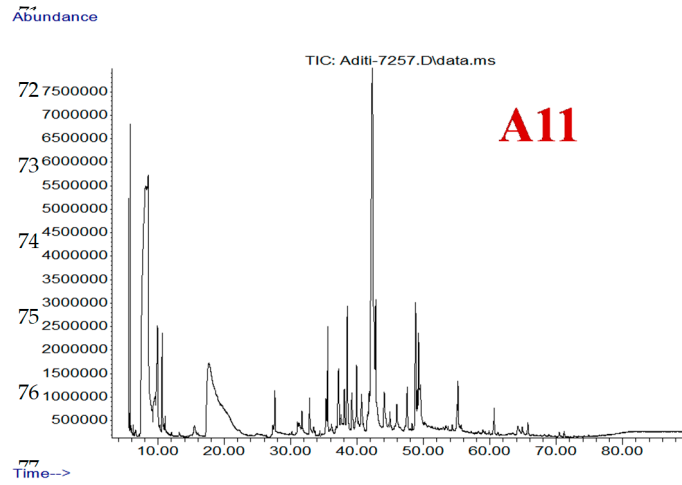

**Figure S6:** GC-MS chromatogram of secondary metabolites from A11 isolate of *T. asperellum*

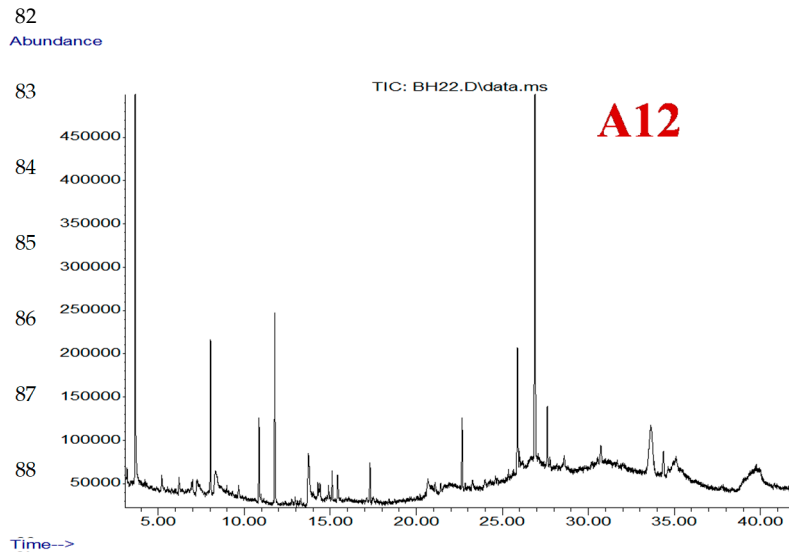

**Figure S7:** GC-MS chromatogram of secondary metabolites from A12 isolate of *T. asperellum*

94

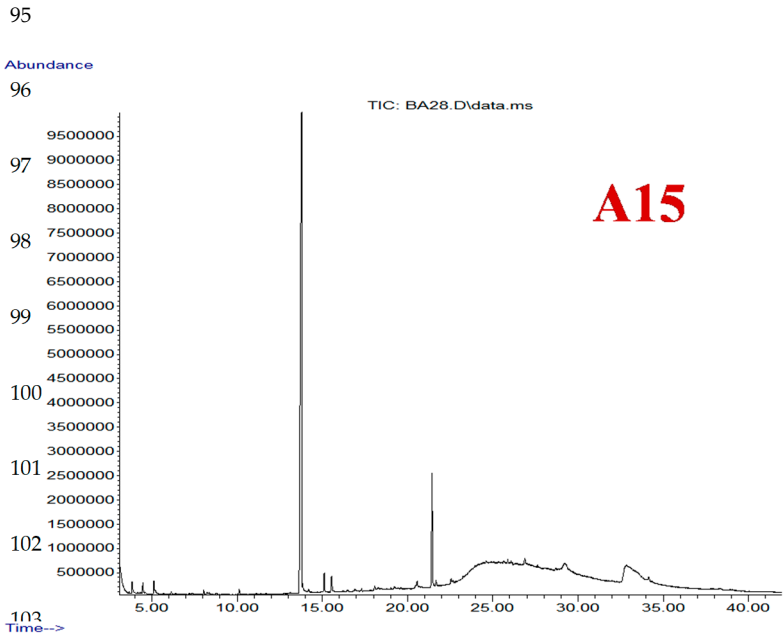

104

Figure S8: GC-MS chromatogram of secondary metabolites from A15 isolate of *T. asperellum*

105

106

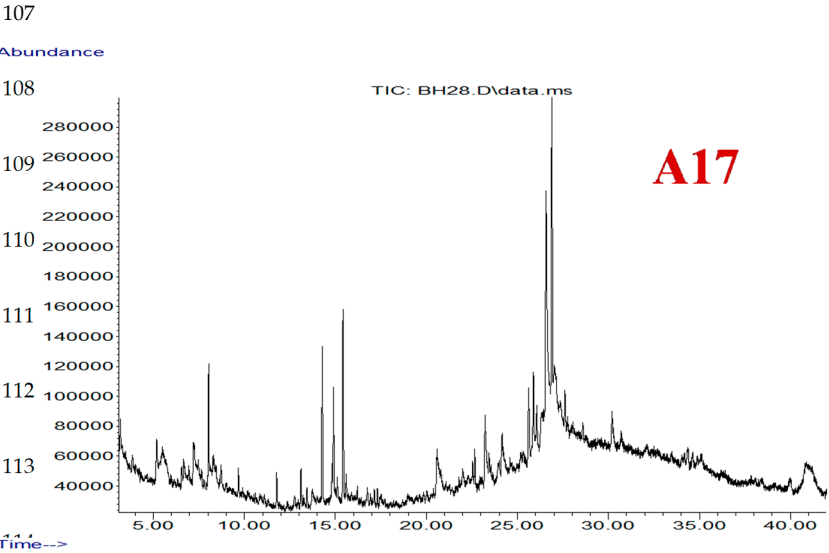

115

Figure S9: GC-MS chromatogram of secondary metabolites from A17 isolate of *T. asperellum*

116

117

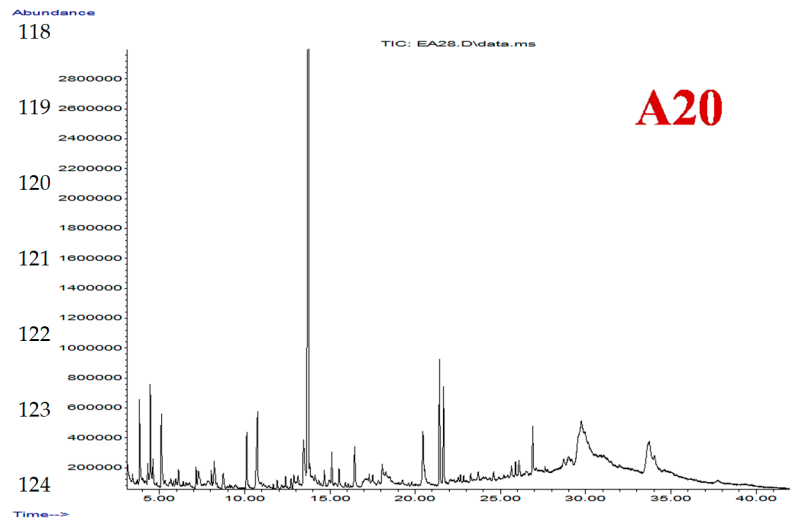

125

**Figure S10** GC-MS chromatogram of secondary metabolites from A20 isolate of *T. asperellum*

126

127

128

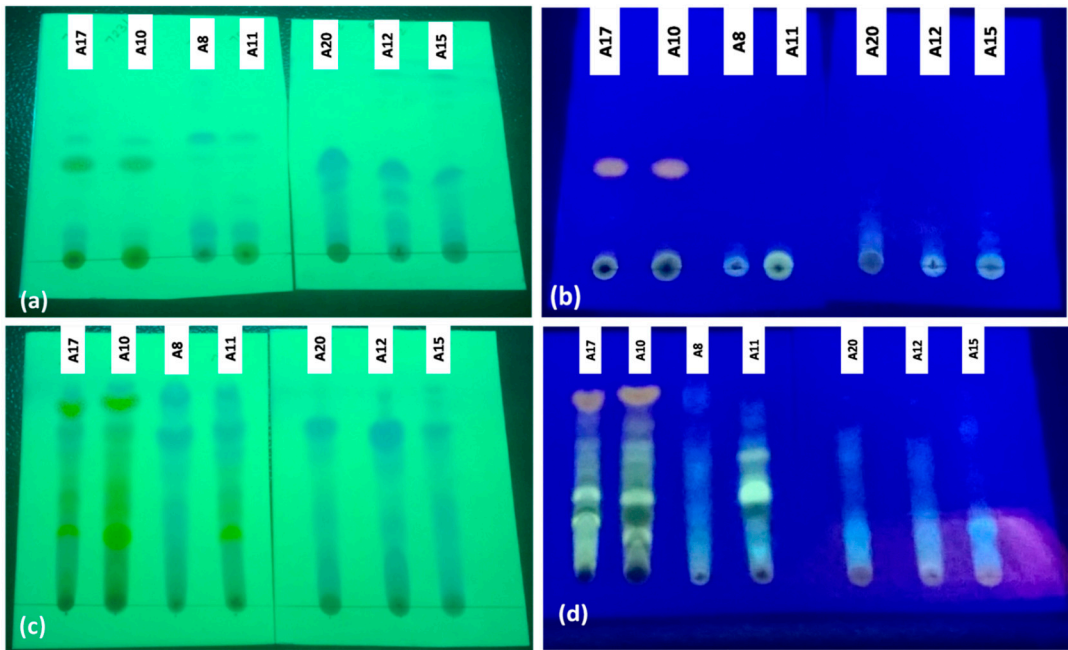

137

**Figure S11:** TLC plates showing many spots of metabolites a) Long UV light range b) Short UV light range in the solvent system: Hexane: Ethyl acetate (9:1) c) Long UV light range d) Short UV light range in the solvent system: Hexane: Ethyl acetate (1:1)

138

139

140
